# Supplementary material for: The Prevalence of Small Intestinal Bacterial Overgrowth in Patients with Non-Alcoholic Liver Diseases: NAFLD, NASH, Fibrosis, Cirrhosis—A Systematic Review, Meta-Analysis and Meta-Regression
Source: MDPI journal article supplement (doi:10.3390/nu14245261), 2022-12-09
Supplement: s1 [file s1]

**Table S1.** The risk o bias of RCTs by means of the Cochrane Collaboration's tool.

| <b>Author,<br/>Year</b> | <b>Sequence<br/>generation</b> | <b>Allocation<br/>concealment</b> | <b>Blinding of<br/>participants and<br/>personnel</b> | <b>Blinding of<br/>outcome<br/>assessment</b> | <b>Incomplete<br/>outcome data<br/>addressed</b> | <b>Selective<br/>reporting</b> | <b>Other bias</b> | <b>Overall<br/>risk-of-bias</b> |
|-------------------------|--------------------------------|-----------------------------------|-------------------------------------------------------|-----------------------------------------------|--------------------------------------------------|--------------------------------|-------------------|---------------------------------|
| Ferolla,<br>S.M; 2016   | SC                             | H                                 | L                                                     | L                                             | L                                                | L                              | SC                | H                               |
| Sajjad, A.;<br>2005     | SC                             | SC                                | H                                                     | H                                             | L                                                | L                              | L                 | H                               |
| Ghetti,<br>F.D.F.; 2019 | L                              | L                                 | SC                                                    | H                                             | L                                                | L                              | SC                | H                               |
| Guimares,<br>V.M.; 2020 | H                              | SC                                | H                                                     | H                                             | L                                                | L                              | SC                | H                               |

H - High risk of bias; L- Low risk of bias; SC - Some concerns

**Table S2.** Newcastle–Ottawa Scale scoring for cohort studies.

| Author, Year       | Summary: Selection<br>bias (max. four stars) | Summary: Comparability<br>(max. two stars) | Summary: Outcome<br>(max. three stars) | Total No. Stars<br>(Max. nine stars) |
|--------------------|----------------------------------------------|--------------------------------------------|----------------------------------------|--------------------------------------|
| Yilmaz, Y;<br>2014 | 4                                            | 2                                          | 1                                      | 7                                    |

**Table S3.** Newcastle–Ottawa Scale scoring for case–control studies.

| Author, Year          | Summary: Selection<br>bias (max. four stars) | Summary: Comparability<br>(max. two stars) | Summary: Exposure<br>(max. three stars) | Total No. Stars<br>(Max. nine stars) |
|-----------------------|----------------------------------------------|--------------------------------------------|-----------------------------------------|--------------------------------------|
| Ghoshal<br>U.C.; 2017 | 3                                            | 0                                          | 2                                       | 5                                    |
| Jun D.W.;<br>2010     | 2                                            | 0                                          | 2                                       | 4                                    |
| Kapil S.;<br>2016     | 2                                            | 0                                          | 1                                       | 3                                    |
| Miele L.;<br>2009     | 4                                            | 1                                          | 3                                       | 8                                    |
| Sabate J-M.;<br>2008  | 3                                            | 1                                          | 2                                       | 6                                    |
| Shanab A.A.;<br>2011  | 4                                            | 1                                          | 2                                       | 7                                    |
| Shi H.; 2021          | 2                                            | 1                                          | 0                                       | 3                                    |
| Wigg A.J.;<br>2001    | 3                                            | 1                                          | 3                                       | 7                                    |

**Table S4.** Newcastle–Ottawa Scale scoring for cross–sectional studies.

| <b>Author, Year</b>        | <b>Summary: Selection bias<br/>(max. five stars)</b> | <b>Summary: Comparability<br/>(max. two stars)</b> | <b>Summary: Outcome (max.<br/>three stars)</b> | <b>Total No.<br/>Stars (Max.<br/>ten stars)</b> |
|----------------------------|------------------------------------------------------|----------------------------------------------------|------------------------------------------------|-------------------------------------------------|
| Fitriakusumah,<br>Y.; 2019 | 4                                                    | 2                                                  | 1                                              | 7                                               |
| Lira M; 2020               | 3                                                    | 2                                                  | 3                                              | 8                                               |
| Mikolasevic, I.;<br>2021   | 3                                                    | 2                                                  | 3                                              | 8                                               |
| De Oliveira,<br>J.M.; 2020 | 2                                                    | 0                                                  | 3                                              | 5                                               |
| Rafiei, R.; 2018           | 5                                                    | 2                                                  | 3                                              | 10                                              |

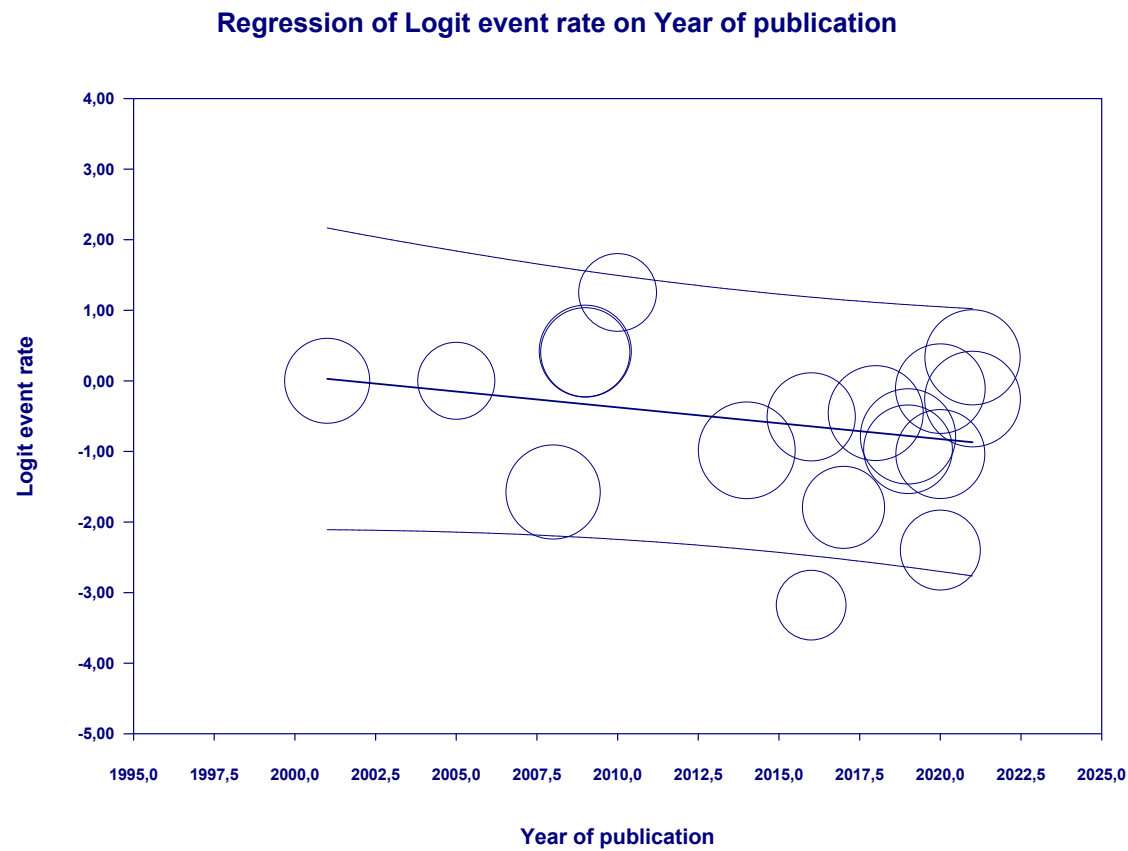

**Figure S1.** The meta-regression on log risk ratio of SIBO prevalence depending on year of publication (coefficient= -0.0450,  $p=0.1675$ )

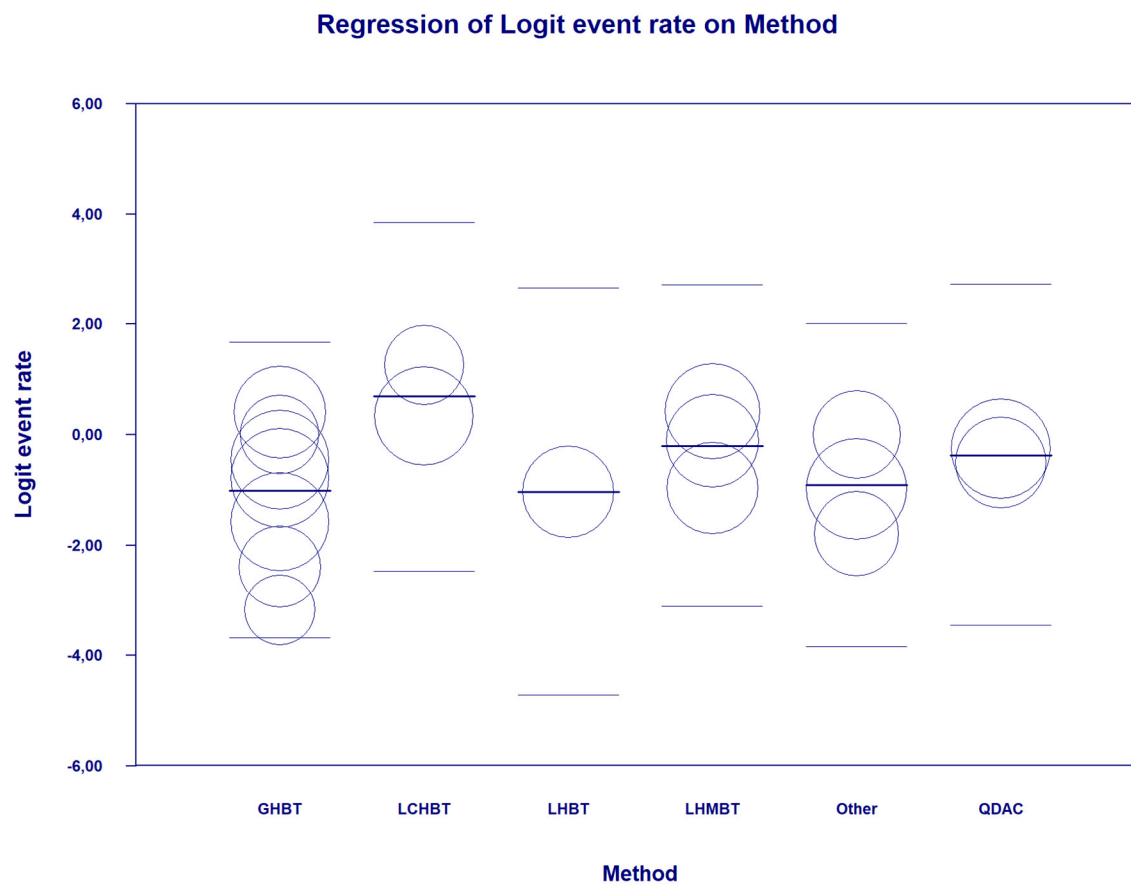

**Figure S2.** The meta-regression on log risk ratio of SIBO prevalence depending on testing method ( $p=0.2993$ ); GHBT - Glucose Hydrogen Breath Test; LCHBT - Lactose Hydrogen Breath Test; LHBT - Lactulose Hydrogen Breath Test; LHMBT - Lactulose Hydrogen-Methane Breath Test; QDAC - Quantitative Duodenal Aspirate Culture
